# Supplementary material for: Contribution of risk factors to excess mortality in isolated and lonely individuals: an analysis of data from the UK Biobank cohort study
Source: PubMed Central journal article supplement (PMC5463031; doi:10.1016/s2468-2667(17)30075-0), 2017-05-04
Supplement: mmc1.pdf [file mmc1.pdf]

# THE LANCET

## Public Health

### Supplementary appendix

This appendix formed part of the original submission and has been peer reviewed. We post it as supplied by the authors.

Supplement to: Elovainio M, Hakulinen C, Pulkki-Råback L, et al. Contribution of risk factors to excess mortality in isolated and lonely individuals: an analysis of data from the UK Biobank cohort study. *Lancet Public Health* 2017; published online May 4. [http://dx.doi.org/10.1016/S2468-2667\(17\)30075-0](http://dx.doi.org/10.1016/S2468-2667(17)30075-0).

## **Online Supplement Appendix**

### **Contents**

1. Supplement Tables 1-4
2. Supplement Figures 1-2

**Supplement Table 1.** Differences between excluded and included participants

| Variable                                 | Excluded<br>Mean or percentage | Included<br>Mean or percentage |
|------------------------------------------|--------------------------------|--------------------------------|
| Age (years)                              | 56.76                          | 56.51                          |
| Male                                     | 48.10 %                        | 45.40 %                        |
| Caucasian                                | 83.78 %                        | 95.39 %                        |
| Deprivation index                        | -0.32                          | -1.37                          |
| Education (university)                   | 25.39 %                        | 33.19 %                        |
| Annual household (income 31k or greater) | 37.25 %                        | 52.41 %                        |
| Chronic illness (yes)                    | 55.11 %                        | 50.51 %                        |
| BMI (kg/m <sup>2</sup> )                 | 27.67                          | 27.42                          |
| Diastolic BP (mm Hg)                     | 82.43                          | 82.2                           |
| Systolic BP (mm Hg)                      | 138.54                         | 137.77                         |
| Handgrip strength (kg)                   | 29.34                          | 30.7                           |
| Smoker                                   | 12.99 %                        | 10.43 %                        |
| Ex-smoker                                | 31.41 %                        | 34.88 %                        |
| Alcohol intake frequency                 | 0.35                           | 0.44                           |
| Moderate physical                        | 3.71                           | 3.62                           |
| Vigorous physical                        | 1.82                           | 1.84                           |
| Cognitive performance                    | 5.18                           | 6.03                           |
| Depressed mood                           | 1.38                           | 1.3                            |
| Unenthusiasm / disinterest               | 1.4                            | 1.28                           |
| Tenseness / restlessness                 | 1.4                            | 1.33                           |
| Tiredness / lethargy                     | 1.84                           | 1.72                           |
| Self-rated health                        | 1.69                           | 1.87                           |

*Note.* Values are means or percentages. All differences are statistically significant ( $p < .05$ ).

**Supplemental Table 2. Pairwise correlation coefficients between social isolation, loneliness, and potential confounders**

|                                | 1.  | 2.  | 3.  | 4.  | 5.  | 6.  | 7.  | 8.  | 9.  | 10. | 11. | 12. | 13. | 14. | 15. | 16. | 17. | 18. | 19. |
|--------------------------------|-----|-----|-----|-----|-----|-----|-----|-----|-----|-----|-----|-----|-----|-----|-----|-----|-----|-----|-----|
| 1. Social isolation            | 100 | 13  | -5  | -13 | 3   | 1   | 0   | -2  | 9   | -1  | -7  | -4  | -7  | -5  | 10  | 10  | 7   | 8   | -11 |
| 2. Loneliness                  | 13  | 100 | -6  | -8  | 5   | 0   | -2  | -2  | 6   | -1  | -5  | -2  | -2  | -4  | 27  | 24  | 20  | 17  | -14 |
| 3. Education                   | -5  | -6  | 100 | 35  | -14 | -4  | -13 | 11  | -8  | -6  | 14  | -6  | 1   | 37  | -5  | -7  | -4  | -6  | 18  |
| 4. Annual household            | -13 | -8  | 35  | 100 | -8  | -1  | -11 | 18  | -8  | -3  | 16  | -9  | 2   | 24  | -9  | -10 | -6  | -7  | 18  |
| 5. BMI (kg/m <sup>2</sup> )    | 3   | 5   | -14 | -8  | 100 | 28  | 19  | 4   | -3  | 8   | -11 | -10 | -9  | -6  | 6   | 8   | 3   | 12  | -27 |
| 6. Diastolic BP (mm Hg)        | 1   | 0   | -4  | -1  | 28  | 100 | 70  | 16  | -2  | 2   | 6   | -2  | -2  | -2  | -2  | 0   | -2  | -2  | -7  |
| 7. Systolic BP (mm Hg)         | 0   | -2  | -13 | -11 | 19  | 70  | 100 | 9   | -5  | 6   | 7   | 3   | 1   | -4  | -8  | -5  | -7  | -9  | -5  |
| 8. Handgrip strength (kg)      | -2  | -2  | 11  | 18  | 4   | 16  | 9   | 100 | 4   | 4   | 15  | 2   | 13  | 11  | -8  | -3  | -6  | -13 | 9   |
| 9. Smoker                      | 9   | 6   | -8  | -8  | -3  | -2  | -5  | 4   | 100 | -25 | 1   | 0   | -3  | -6  | 9   | 11  | 8   | 8   | -13 |
| 10. Ex-smoker                  | -1  | -1  | -6  | -3  | 8   | 2   | 6   | 4   | -25 | 100 | 13  | 1   | 1   | 2   | -2  | -2  | -1  | -2  | -3  |
| 11. Alcohol intake frequency   | -7  | -5  | 14  | 16  | -11 | 6   | 7   | 15  | 1   | 13  | 100 | 0   | 2   | 16  | -6  | -7  | -4  | -10 | 12  |
| 12. Moderate physical          | 4   | -2  | -6  | -9  | -10 | -2  | 3   | 2   | 0   | 1   | 0   | 100 | 49  | -10 | -3  | -4  | -2  | -8  | 11  |
| 13. Vigorous physical          | -7  | -2  | 1   | 2   | -9  | -2  | 1   | 13  | -3  | 1   | 2   | 49  | 100 | -7  | -4  | -4  | -3  | -11 | 18  |
| 14. Cognitive performance      | -5  | -4  | 37  | 24  | -6  | -2  | -4  | 11  | -6  | 2   | 16  | -10 | -7  | 100 | -9  | -12 | -9  | -7  | 13  |
| 15. Depressed mood             | 10  | 27  | -5  | -9  | 6   | -2  | -8  | -8  | 9   | -2  | -6  | -3  | -4  | -9  | 100 | 62  | 57  | 43  | -27 |
| 16. Unenthusiasm / disinterest | 10  | 24  | -7  | -10 | 8   | 0   | -5  | -3  | 11  | -2  | -7  | -4  | -4  | -12 | 62  | 100 | 49  | 42  | -27 |
| 17. Tenseness / restlessness   | 7   | 20  | -4  | -6  | 3   | -2  | -7  | -6  | 8   | -1  | -4  | -2  | -3  | -9  | 57  | 49  | 100 | 42  | -24 |
| 18. Tiredness / lethargy       | 8   | 17  | -6  | -7  | 12  | -2  | -9  | -13 | 8   | -2  | -10 | -8  | -11 | -7  | 43  | 42  | 42  | 100 | -39 |
| 19. Self-rated health          | -11 | -14 | 18  | 18  | -27 | -7  | -5  | 9   | -13 | -3  | 12  | 11  | 18  | 13  | -27 | -27 | -24 | -39 | 100 |

*Note.* Correlation coefficients are multiplied by 100.

**Supplement Table 3.** Frequencies of complete and imputed variables

| Variable                      | Complete | Imputed | Total  |
|-------------------------------|----------|---------|--------|
| BMI (kg/m <sup>2</sup> )      | 496566   | 2672    | 499238 |
| Diastolic BP (mm Hg)          | 469637   | 29601   | 499238 |
| Systolic BP (mm Hg)           | 469632   | 29606   | 499238 |
| Handgrip strength (kg)        | 497277   | 1961    | 499238 |
| Moderate physical (range 0-7) | 473193   | 26045   | 499238 |
| Vigorous physical (range 0-7) | 472892   | 26346   | 499238 |
| Education                     | 490210   | 9028    | 499238 |
| Annual household income       | 423762   | 75476   | 499238 |
| Depressed mood                | 476325   | 22913   | 499238 |
| Unenthusiasm / disinterest    | 480687   | 18551   | 499238 |
| Tenseness / restlessness      | 478324   | 20914   | 499238 |
| Tiredness / lethargy          | 483188   | 16050   | 499238 |
| Cognitive performance         | 164571   | 334667  | 499238 |
| Social isolation              | 487847   | 11391   | 499238 |
| Loneliness                    | 474325   | 24913   | 499238 |
| Smoker                        | 497328   | 1910    | 499238 |
| Ex-Smoker                     | 497328   | 1910    | 499238 |
| Alcohol intake frequency      | 498767   | 471     | 499238 |
| Chronic illness               | 483744   | 15494   | 499238 |
| Self-rated health             | 496842   | 2396    | 499238 |

**Supplemental Table 4.** Hazard ratios (HRs) and 95% confidence intervals (CIs) for the effect of social isolation and loneliness on all-cause mortality

|                         | All              | Women            | Men              |
|-------------------------|------------------|------------------|------------------|
|                         | HR (95% CI)      | HR (95% CI)      | HR (95% CI)      |
| <b>Social isolation</b> |                  |                  |                  |
| 0 point                 | Reference        | Reference        | Reference        |
| 1 point                 | 1.36 (1.31-1.41) | 1.32 (1.24-1.40) | 1.39 (1.32-1.46) |
| 2 point                 | 2.01 (1.90-2.13) | 1.88 (1.70-2.05) | 2.12 (1.97-2.27) |
| 3 point                 | 3.38 (2.92-3.83) | 2.71 (1.91-3.51) | 3.65 (3.09-4.20) |
| <b>Loneliness</b>       |                  |                  |                  |
| 0 point                 | Reference        | Reference        | Reference        |
| 1 point                 | 1.25 (1.20-1.30) | 1.22 (1.14-1.30) | 1.28 (1.21-1.34) |
| 2 point                 | 1.59 (1.48-1.69) | 1.44 (1.28-1.59) | 1.71 (1.56-1.85) |

Analyses are adjusted for age, sex, and ethnicity.

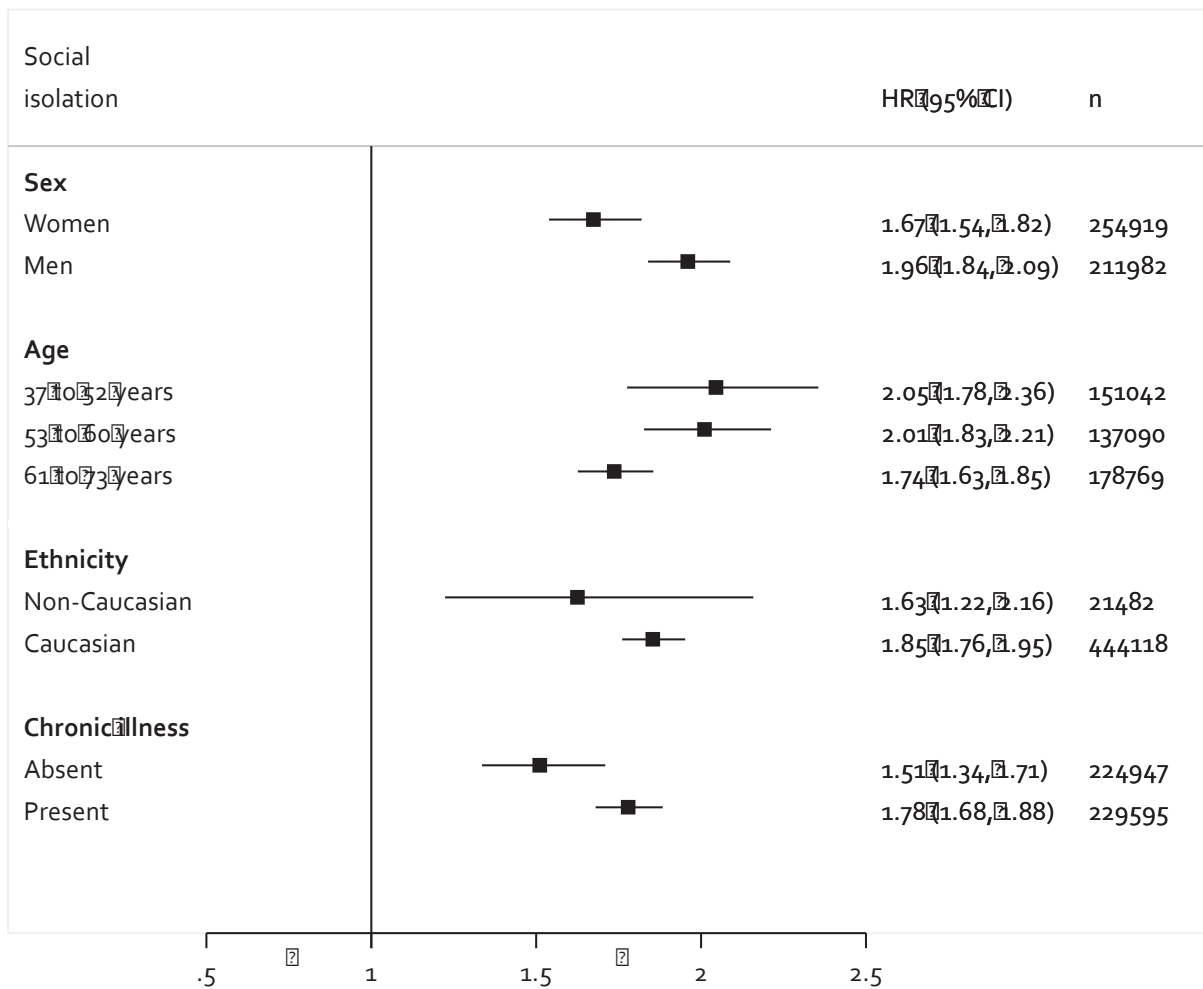

Supplement figure 1. Hazard ratios (HRs) for the association of social isolation (compared to no social isolation) with all-cause mortality in various sub-groups of potential baseline confounders

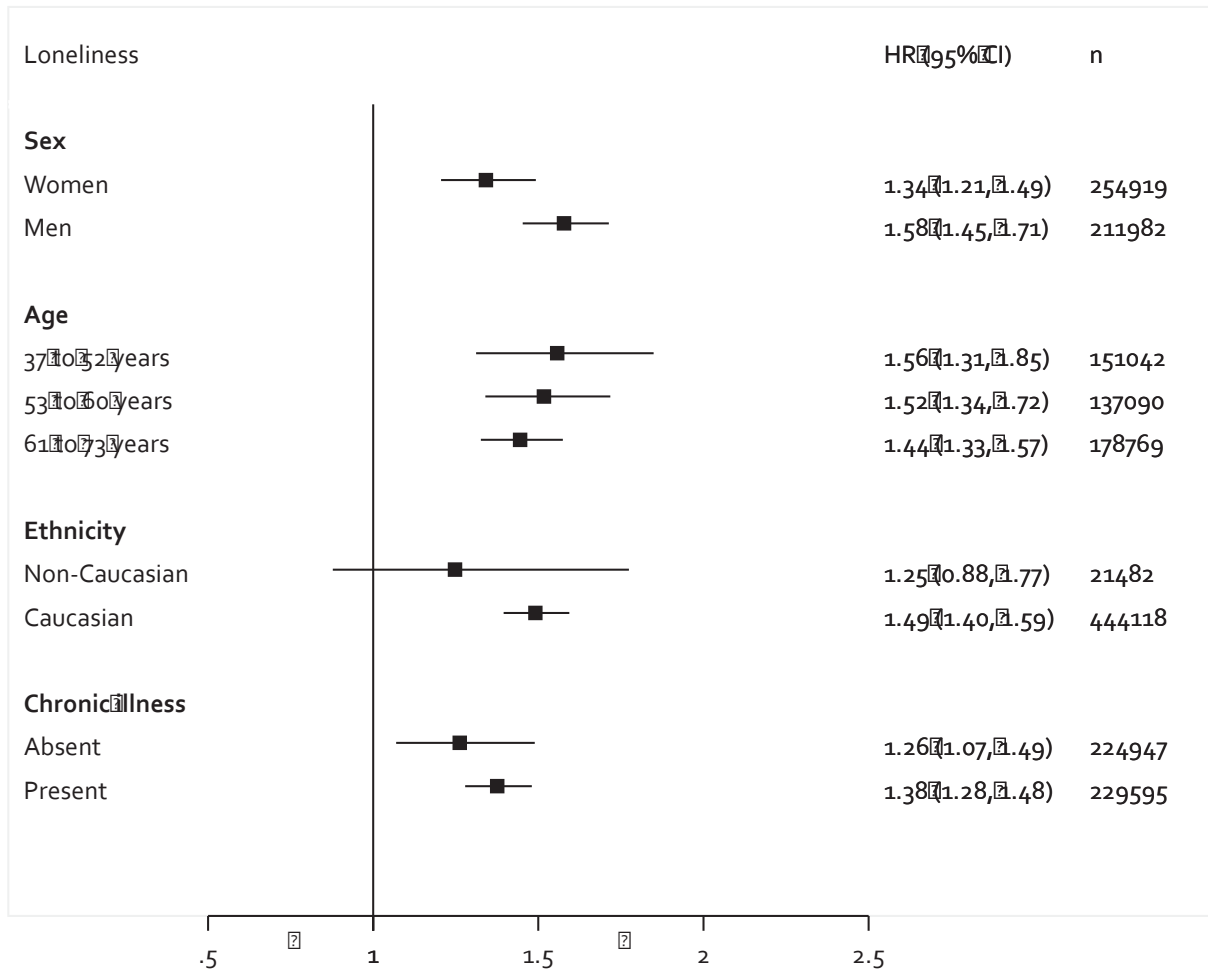

Supplement figure 2. Hazard ratios (HRs) for the association of loneliness (compared to no loneliness) with all-cause mortality in various sub-groups of potential baseline confounders
